# Supplementary material
Source: PubMed Central journal article supplement (PMC1783107)
Supplement: pnas_0608659104_3.pdf [file pnas_0608659104_3.pdf]

**Table 2.** Comparison of SAHA-sensitive targets of SAHA-BPyne across human cancer cell lines.

| Protein                      | IPI number  | Average ( $\pm$ SEM)<br>SAHA-BPyne spectral counts |               |               |               |
|------------------------------|-------------|----------------------------------------------------|---------------|---------------|---------------|
|                              |             | MUM2C                                              | MUM2B         | OVCAR3        | SKOV3         |
| HDAC1                        | IPI00013774 | 20 $\pm$ 2                                         | 18 $\pm$ 2    | 17 $\pm$ 3    | 24 $\pm$ 4    |
| HDAC2                        | IPI00289601 | 23 $\pm$ 2                                         | 21 $\pm$ 2    | 25 $\pm$ 3    | 24 $\pm$ 3    |
| HDAC3                        | IPI00006187 | 1.5 $\pm$ 0.9                                      | 2.8 $\pm$ 0.9 | 5 $\pm$ 1     | 3.0 $\pm$ 0.6 |
| HDAC6                        | IPI00005711 | 5 $\pm$ 1                                          | 0.6 $\pm$ 0.6 | 3 $\pm$ 2     | 5.7 $\pm$ 0.7 |
| CoREST protein               | IPI00008531 | 0.5 $\pm$ 0.5                                      | 6.5 $\pm$ 0.9 | 0.8 $\pm$ 0.9 | 1.7 $\pm$ 0.9 |
| Methyl-CpG binding protein 3 | IPI00439194 | 21 $\pm$ 3                                         | 19 $\pm$ 3    | 7 $\pm$ 2     | 4 $\pm$ 1     |
| MTA1                         | IPI00012773 | 7.8 $\pm$ 0.6                                      | 6 $\pm$ 1     | 6 $\pm$ 1     | 3 $\pm$ 1     |
| MTA2                         | IPI00171798 | 10 $\pm$ 1                                         | 8 $\pm$ 2     | 5.5 $\pm$ 0.9 | 6.3 $\pm$ 0.7 |
| p66 $\beta$                  | IPI00103554 | 6 $\pm$ 1                                          | 2.8 $\pm$ 0.9 | 5.0 $\pm$ 0.8 | 0.7 $\pm$ 0.7 |

Signals correspond to average spectral counts for each protein, calculated as described in Jessani N, Niessen S, Wei BQ, Nicolau M, Humphrey M, Ji Y, Han W, Noh DY, Yates JR, III, Jeffrey SS, Cravatt BF (2005) *Nat Methods* 2: 691-697.

n = 3-7 experiments per cell line.
