# Supplementary material
Source: PubMed Central journal article supplement (PMC1783107)
Supplement: pnas_0608659104_4.pdf [file pnas_0608659104_4.pdf]

**Table 3.** ABPP-MudPIT data for SAHA-BPyne-treated melanoma cancer lines.

| MUM2C Specifically labeled proteins              | Spectral counts |    |    |    |      |   |   |          |   |    |   |
|--------------------------------------------------|-----------------|----|----|----|------|---|---|----------|---|----|---|
|                                                  | SAHA-BPyne      |    |    |    | SAHA |   |   | No probe |   | MP |   |
| IPI00005711 - Histone deacetylase 6              | 7               | 2  | 7  | 4  | 0    | 0 | 0 | 0        | 0 | 0  | 0 |
| IPI00439194 - Methyl-CpG binding protein 3       | 13              | 20 | 21 | 28 | 0    | 3 | 0 | 0        | 0 | 0  | 0 |
| IPI00013774 - Histone deacetylase 1              | 14              | 21 | 22 | 24 | 4    | 0 | 2 | 0        | 0 | 0  | 2 |
| IPI00171798 - Metastasis associated protein MTA2 | 10              | 9  | 7  | 12 | 3    | 0 | 0 | 0        | 0 | 0  | 0 |
| IPI00103554 - Transcriptional repressor p66 beta | 5               | 3  | 7  | 7  | 0    | 0 | 2 | 0        | 0 | 0  | 0 |
| IPI00289601 - Histone deacetylase 2              | 19              | 25 | 20 | 26 | 5    | 3 | 2 | 4        | 0 | 0  | 2 |
| IPI00012773 - Metastasis-associated protein MTA1 | 8               | 6  | 8  | 9  | 3    | 3 | 3 | 3        | 3 | 0  | 0 |
| IPI00008531 - CoREST protein                     | 0               | 0  | 0  | 2  | 0    | 0 | 0 | 0        | 0 | 0  | 0 |
| IPI00006187 - Histone deacetylase 3              | 3               | 3  | 0  | 0  | 0    | 0 | 0 | 0        | 0 | 0  | 0 |

| MUM2B Specifically labeled proteins              | Spectral counts |    |    |    |    |    |    |    |      |   |   |          |   |   |    |   |   |   |
|--------------------------------------------------|-----------------|----|----|----|----|----|----|----|------|---|---|----------|---|---|----|---|---|---|
|                                                  | SAHA-BPyne      |    |    |    |    |    |    |    | SAHA |   |   | no probe |   |   | MP |   |   |   |
| IPI00008531 - CoREST protein                     | 2               | 7  | 10 | 9  | 7  | 5  | 5  | 7  | 0    | 0 | 0 | 0        | 0 | 0 | 0  | 0 | 0 | 0 |
| IPI00439194 - Methyl-CpG binding protein 3       | 14              | 12 | 12 | 24 | 16 | 25 | 38 | 11 | 0    | 0 | 0 | 0        | 0 | 0 | 0  | 0 | 0 | 0 |
| IPI00013774 - Histone deacetylase 1              | 13              | 15 | 25 | 13 | 19 | 16 | 23 | 20 | 2    | 0 | 0 | 0        | 0 | 0 | 4  | 0 | 4 | 2 |
| IPI00171798 - Metastasis associated protein MTA2 | 4               | 3  | 8  | 4  | 10 | 6  | 23 | 6  | 2    | 0 | 0 | 3        | 0 | 0 | 0  | 0 | 0 | 0 |
| IPI00289601 - Histone deacetylase 2              | 17              | 22 | 27 | 12 | 21 | 30 | 25 | 14 | 9    | 3 | 0 | 6        | 0 | 6 | 10 | 5 | 7 | 3 |
| IPI00012773 - Metastasis-associated protein MTA1 | 3               | 0  | 12 | 6  | 7  | 7  | 9  | 3  | 0    | 2 | 3 | 4        | 0 | 0 | 0  | 0 | 2 | 0 |
| IPI00006187 - Histone deacetylase 3              | 0               | 3  | 5  | 0  | 6  | 0  | 5  | 3  | 0    | 0 | 0 | 0        | 0 | 0 | 0  | 0 | 0 | 0 |
| IPI00103554 - Transcriptional repressor p66 beta | 2               | 2  | 2  | 4  | 5  | 0  | 7  | 0  | 0    | 0 | 0 | 0        | 0 | 0 | 0  | 0 | 0 | 0 |
| IPI00005711 - Histone deacetylase 6              | 0               | 0  | 0  | 0  | 0  | 0  | 5  | 0  | 0    | 0 | 0 | 0        | 0 | 0 | 0  | 0 | 0 | 0 |

Spectral counts are shown for specifically labeled proteins from individual proteomic samples. Averages for these data can be found in Tables 1 and 2. Shaded boxes show data for relevant proteins that did not meet the criteria for specifically labeled proteins as defined in Results.
