# Supplementary material
Source: PubMed Central journal article supplement (PMC1783107)

Breast Cancer

MCF7      231  
-    +      -    +

Ovarian Cancer

OVCAR3    SKOV3  
-    +      -    +

Melanoma

MUM2C    MUM2B  
-    +      -    +

SAHA

kDa

150 -

100 -

75 -

50 -

37 -

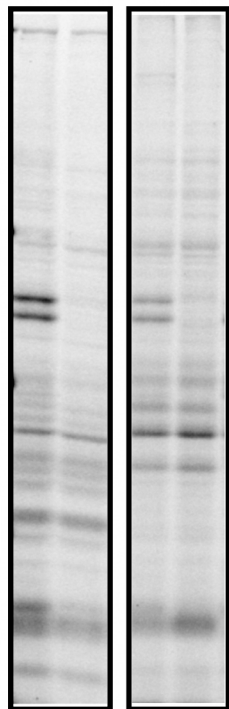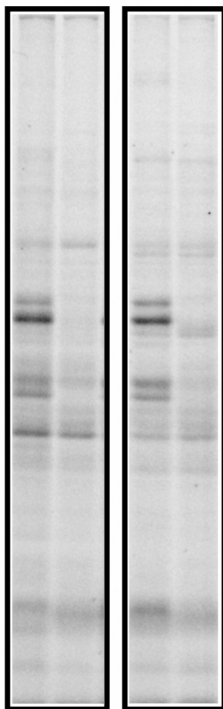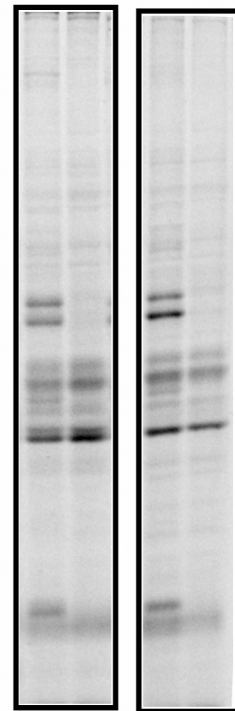

Supplement: pnas_0608659104_1.pdf [file pnas_0608659104_1.pdf]

Soluble

Nuclear

-

S

T

-

S

T

kDa

150 -

100 -

75 -

50 -

37 -

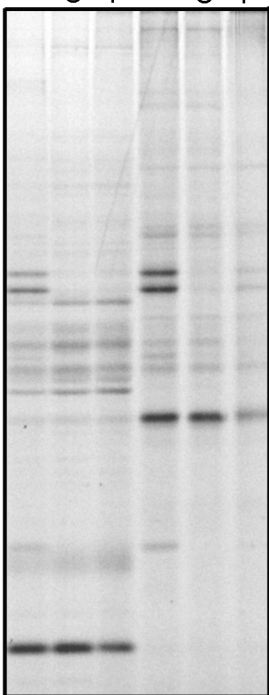

Supplement: pnas_0608659104_2.pdf [file pnas_0608659104_2.pdf]
